# Supplementary material
Source: Springer Nature journal article supplement (https://www.springermedizin.de/resource/supplementary/40001_2013_98_MOESM2_ESM.pdf/9685256)

**A**

first incident

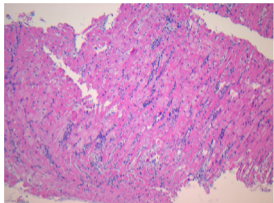

100x

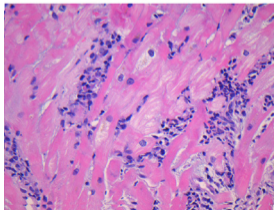

400x

**B**

relapse

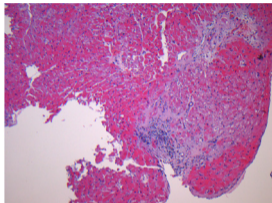

100x

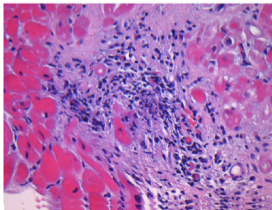

400x

Supplement: MOESM2 [file 9685256]
